# Supplementary material for: Histone Methyltransferase SETD2 Is Required for Porcine Early Embryonic Development
Source: MDPI journal article supplement (doi:10.3390/ani12172226), 2022-08-29
Supplement: s1 [file s1]

**Figure S1. Effect of SETD2 knockdown on development of early cleavage-stage parthenogenetic embryos**

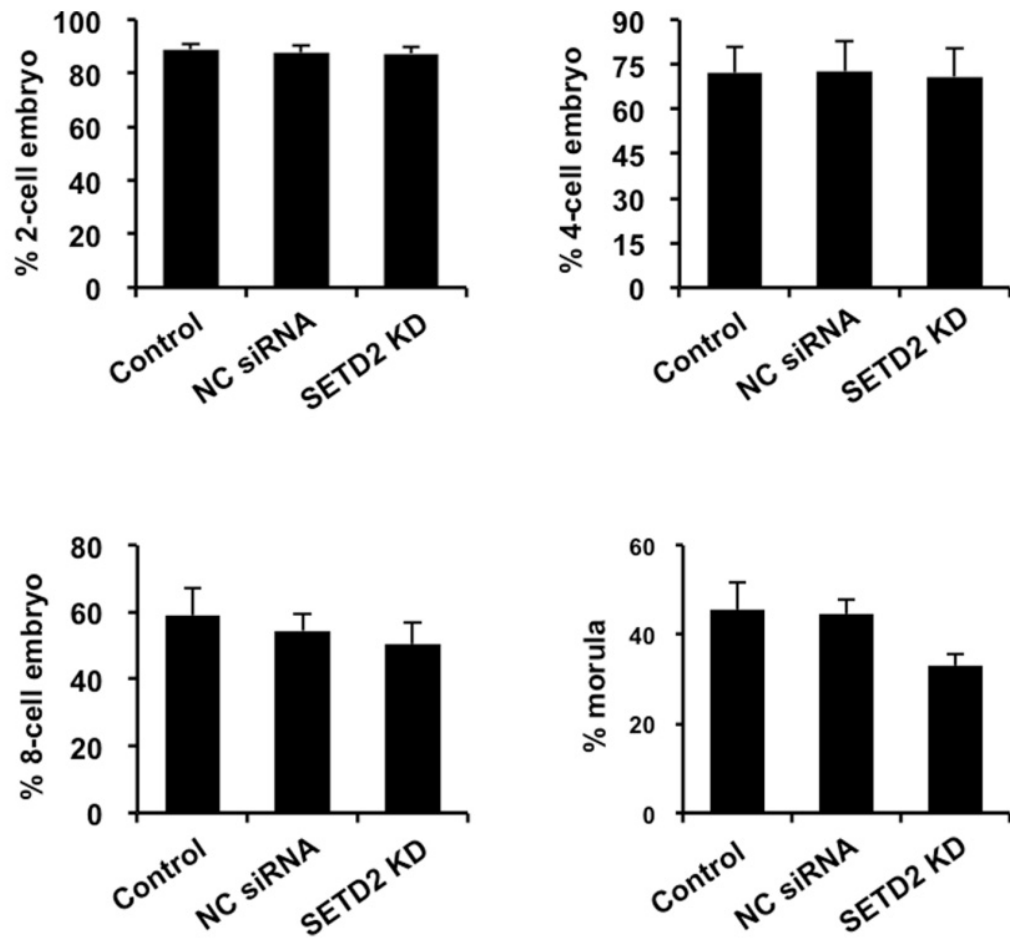

Developmental rates of 2-cell (A), 4-cell (B), 8-cell (C) and morula (D) in control, NC siRNA injection and *SETD2* KD groups. All data are shown as mean  $\pm$  S.E.M and different letters on the bars indicate significant differences ( $P < 0.05$ ).

**Figure S2. Effect of SETD2 knockdown on both development of *in vitro* fertilization embryos and lineage allocation in blastocysts**

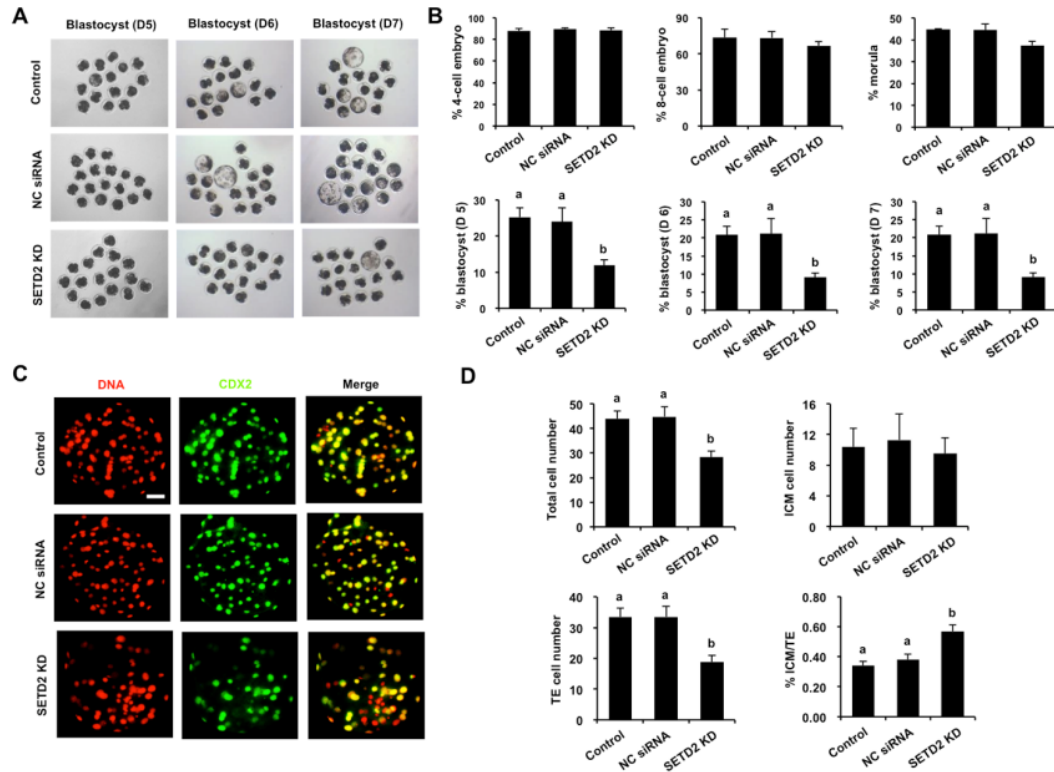

(A) Representative images of blastocysts at day 5, 6 and 7 in each group. Scale bar: 100  $\mu$ m. (B) Developmental rates of embryos from the 4-cell to the blastocyst stage. (C) Representative fluorescence images of blastocysts. Embryos in each group were stained for CDX2 (green) and DNA (red). The experiment was independently repeated three times with at least 20 embryos per group. Scale bar: 50  $\mu$ m. (D) Analysis of lineage allocation in embryos. The numbers of total cells, ICM cells, TE cells, and the ratio of ICM cells to TE cells were separately recorded and subjected to statistical analysis. ICM: inner cell mass; TE: trophectoderm. All data are presented as mean  $\pm$  S.E.M and different letters on the bars indicate significant differences ( $P < 0.05$ ).

**Table S1. Porcine-specific primer sequences used in this study**

| Gene symbol                    | Primer sequences (5'-3')                                | Product size (bp) | GenBank accession number |
|--------------------------------|---------------------------------------------------------|-------------------|--------------------------|
| <i>SETD2</i>                   | F: AGCGAATGCAGTGTGAGTGT<br>R: CCCCATTTGGACACCGAGAA      | 126               | XM_021068704.1           |
| <i>OCT4</i>                    | F: CGAGAACCGAGTGAGAGG<br>R: GGAAAGGAGACCCAGCAG          | 206               | NM_001113060.1           |
| <i>NANOG</i>                   | F: CTCTCCTCTTCCTTCCTC<br>R: CTTCTGCTTCTTGACTGG          | 139               | NM_001129971.1           |
| <i>TEAD4</i>                   | F: CATTACTCCTACCGCATCC<br>R: CCTGTGTGTCTCTGTTGG         | 151               | NM_001142666.1           |
| <i>GATA3</i>                   | F: CACGACACGCTGGAGGAC<br>R: GGCTGGAGTGGCTGAAGG          | 106               | NM_001044567.1           |
| <i>TFAP2C</i>                  | F: CACGTTCCGGTTGAAAAGGC<br>R: CAGTCCAGGGTTTCGGAGAG      | 105               | NM_001123201.1           |
| <i>YAP</i>                     | F: AAGCCTCTTGTCTGCTGAGG<br>R: GTTGTAGCGATCCCAGGCTT      | 118               | XM-021062706.1           |
| <i>EOMES</i>                   | F: CCATCTCCACGGATTCTCC<br>R: GCACGGTTCTCTCGCCATTA       | 133               | XM_005669315.3           |
| <i>BMP4</i>                    | F: GGCTGACCACCTCAACTCAA<br>R: CTCAGTTCGGTGGGAACACA      | 102               | NM_001101031             |
| <i>BCL2</i>                    | F: GGTACCGGAGGGCATTCACT<br>R: TCCCGGAAGAGTTCGTTAC       | 100               | NM_214285                |
| <i>BAX</i>                     | F: TGCTTCAGGGTTTCATCC<br>R: AGACACTCGCTCAACTTC          | 112               | XM_003127290.4           |
| <i>CASPASE3</i>                | F: GGATTGAGACGGACAGTG<br>R: CGCCAGGAATAGTAACCAG         | 109               | NM_214131.1              |
| <i>P53</i>                     | F: CCACCATCCACTACAACCTC<br>R: AAACACGCACCTCAAAGC        | 135               | NM_213824.3              |
| <i>SOX2</i>                    | F: CGCAGACCTACATGAACG<br>R: TCGGACTTGACCACTGAG          | 103               | NM_001123197.1           |
| <i>CDX2</i>                    | F: AGTCGCTACATCACCATTGGAG<br>R: GCTGCTGTTGCTGCAACTTCTTC | 139               | NM_001278769.1           |
| <i>EF1<math>\alpha</math>1</i> | F: ATTGTTGCTGCTGGTGTG<br>R: TCATATCTCTTCTGGCTGTAGG      | 161               | NM_001097418-2           |

**F: forward,  
R: reverse**

| Table S2. List of primary antibodies used in this study |         |            |                      |
|---------------------------------------------------------|---------|------------|----------------------|
| Primary antibody                                        | Species | Vendor     | Cat.no. and dilution |
| CDX2                                                    | Mouse   | Biogenex   | AM392 (ready to use) |
| H3K36me3                                                | Rabbit  | abcam      | ab9050 (1:100)       |
| H3K36me2                                                | Rabbit  | abcam      | ab9049 (1:100)       |
| List of secondary antibodies used in this study         |         |            |                      |
| Secondary antibody                                      | Species | Vendor     | Cat.no. and dilution |
| Alexa Fluor 488 anti-mouse IgG                          | Goat    | Invitrogen | A11029 (1:200)       |
| Alexa Fluor 594 anti-rabbit IgG                         | Goat    | Invitrogen | A11012 (1:200)       |
| HRP-labeled Goat Anti-Rabbit IgG (H+L)                  | Goat    | Beyotime   | A0208 (1:4000)       |

**Table S3. Information on *SETD2* siRNA sequences**

| No. siRNA | Sequence (5'-3')      |                       |
|-----------|-----------------------|-----------------------|
|           | Sense                 | Antisense             |
| 1         | GCACAUACUUCUGAUGAUUTT | AAUCAUCAGAAGUAUGUGCTT |
| 2         | CCUUCAGGCUCAGAGUUAATT | UUAACUCUGAGCCUGAAGGTT |
| 3         | GCAGUAUUCUCCUGCACAATT | UUGUGCAGGAGAAUACUGCTT |
